# Supplementary material for: A novel electrochemical sensor for non-ergoline dopamine agonist pramipexole based on electrochemically reduced graphene oxide nanoribbons
Source: Royal Society of Chemistry journal article supplement (doi:10.1039/c5ay00282f), 2015-01-01
Supplement: c5ay00282f1.pdf [file c5ay00282f1.pdf]

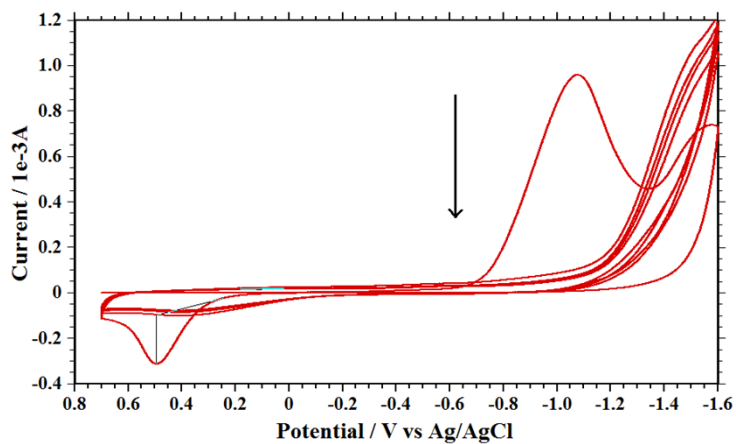

**Fig.S1** Cyclic voltammograms of GONRS film at GCE in phosphate buffer of pH 6.

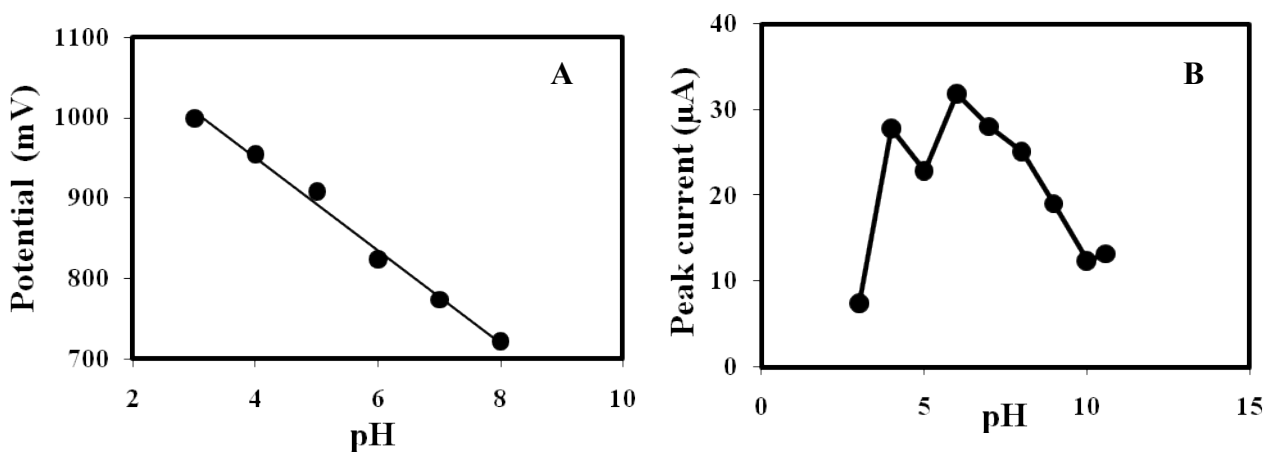

**Fig. S2** Dependence of peak current (A) and peak potential (B) of PPX on pH of phosphate buffer solution

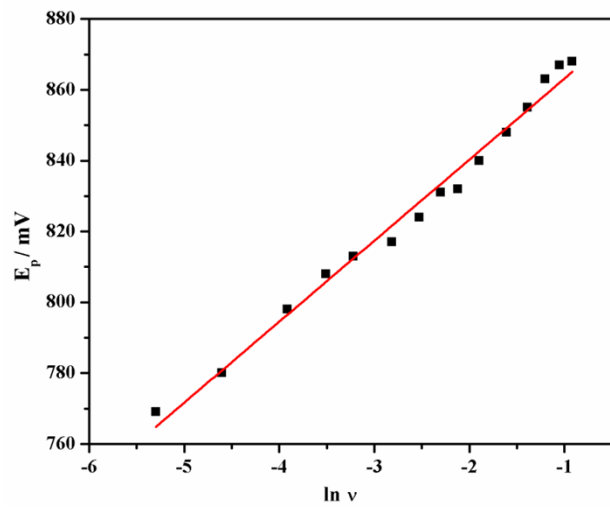

**Fig.S3** Dependence of peak potential ( $E_p$ ) on natural logarithm of scan rate ( $\ln v$ )
